# Supplementary material for: Discrimination of flavonoids and red wine varietals by arrays of differential peptidic sensors
Source: Royal Society of Chemistry journal article supplement (doi:10.1039/c0sc00487a), 2010-11-26
Supplement: c0sc00487a.pdf [file c0sc00487a.pdf]

## Electronic Supplementary Information

### Discrimination of Flavonoids and Red Wine Varietals by Arrays of Differential Peptidic Sensors

Alona P. Umali,<sup>a</sup> Sarah E. LeBoeuf,<sup>a</sup> Robert W. Newberry,<sup>a</sup> Siwon Kim,<sup>a</sup> Lee Tran,<sup>a</sup> Whitney Rome,<sup>a</sup> Tian Tian,<sup>a</sup> David Taing,<sup>a</sup> Jane Hong,<sup>a</sup> Melissa Kwan,<sup>a</sup> Hildegarde Heymann,<sup>b</sup> and Eric V. Anslyn<sup>a,c</sup> \*

<sup>a</sup>College of Natural Sciences, University of Texas at Austin, Austin, TX 78712 USA.

<sup>b</sup>Department of Viticulture and Oenology, University of California Davis, Davis, CA 95616 USA. <sup>c</sup>Department of Chemistry and Biochemistry, University of Texas at Austin, TX 78712 USA.

E-mail: anslyn@austin.utexas.edu

**Table S1.** MS analysis and yields of peptides

| Peptide   | Sequence  | % Yield | MS (Calc'd)                                                | MS (Found)                                          |
|-----------|-----------|---------|------------------------------------------------------------|-----------------------------------------------------|
| <b>1</b>  | IHIGHHI   | 95.8    | 825.46 (M <sup>+</sup> )                                   | 826, M+2H <sup>+</sup>                              |
| <b>2</b>  | WAHEDEFF  | 47.2    | 1080.44 (M <sup>+</sup> )                                  | 1081, M+H <sup>+</sup> ; 1103, M+Na <sup>+</sup>    |
| <b>3</b>  | FHFPHHF   | 60.0    | 968.45 (M <sup>+</sup> )                                   | 969, M+H <sup>+</sup> ; 485, M+2H <sup>+</sup>      |
| <b>4</b>  | WGHGGHHG  | 57.0    | 844.36 (M <sup>+</sup> )                                   | 845, M+H <sup>+</sup> ; 866, M+Na <sup>+</sup>      |
| <b>5</b>  | WDHHHD    | 35.6    | 846.33 (M <sup>+</sup> )                                   | 846.55, M+H <sup>+</sup>                            |
| <b>6</b>  | WEHHHE    | 75.0    | 874.36 (M <sup>+</sup> )                                   | 438, M+2H <sup>+</sup>                              |
| <b>7</b>  | WDDHDD    | 70.5    | 802.26 (M <sup>+</sup> )                                   | 402, M+2H <sup>+</sup>                              |
| <b>8</b>  | WEEHEE    | 66.7    | 858.33 (M <sup>+</sup> )                                   | 430, M+2H <sup>+</sup>                              |
| <b>9</b>  | PHGGGWGQ  | 40.3    | 795.45 (M <sup>+</sup> )                                   | 795.54 M+H <sup>+</sup><br>398.70 M+2H <sup>+</sup> |
| <b>10</b> | WHCCHDHCD | 30.5    | 1155.36 (M <sup>+</sup> )<br>578.18 (M + 2H <sup>+</sup> ) | 578.59, M + 2H <sup>+</sup>                         |

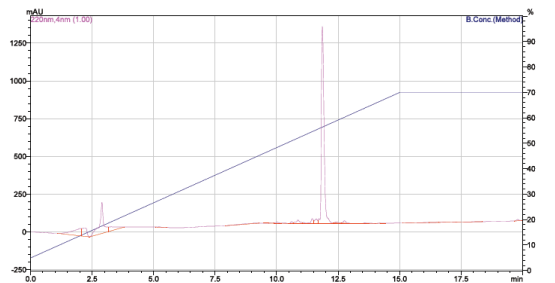

**Figure S1.** HPLC chromatogram of **1** (220 nm)

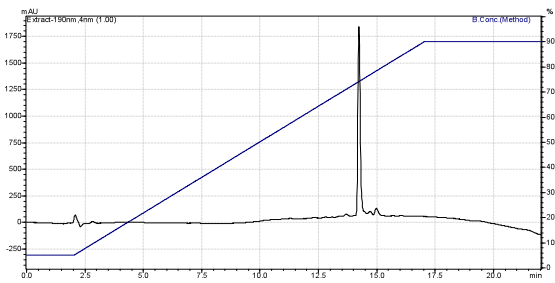

**Figure S2.** HPLC chromatogram of **2** (190 nm)

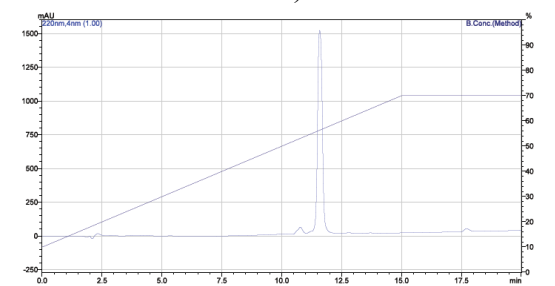

**Figure S3.** HPLC chromatogram of **3** (220 nm)

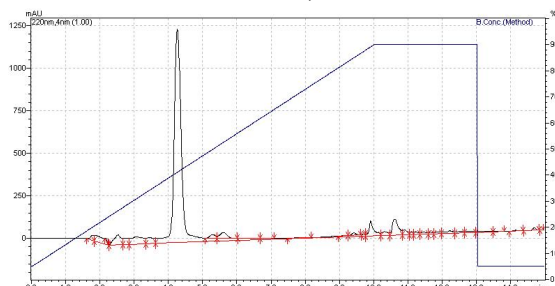

**Figure S4.** HPLC chromatogram of **4** (220 nm)

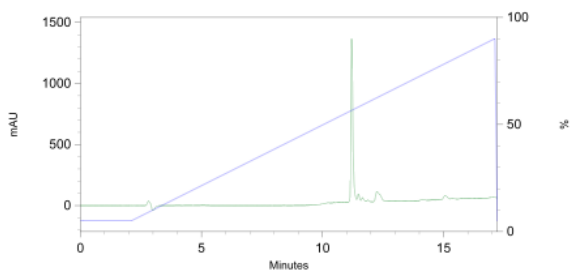

**Figure S5.** HPLC chromatogram of **5** (220 nm)

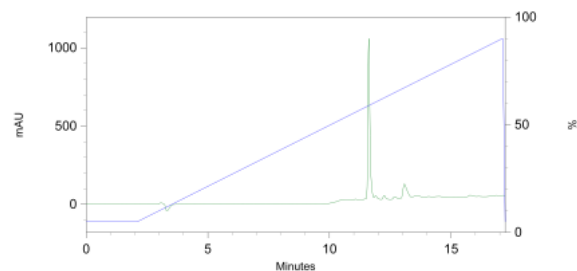

**Figure S6.** HPLC chromatogram of **6** (220 nm)

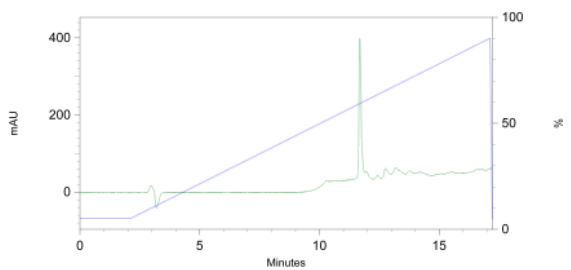

**Figure S7.** HPLC chromatogram of **7** (220 nm)

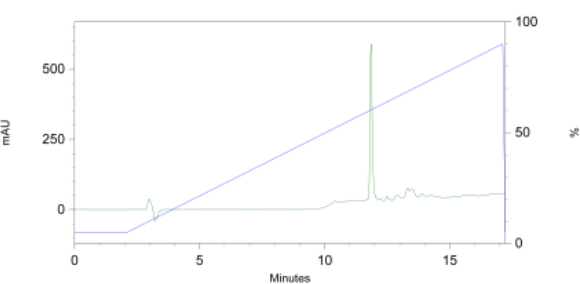

**Figure S8.** HPLC chromatogram of **8** (220 nm)

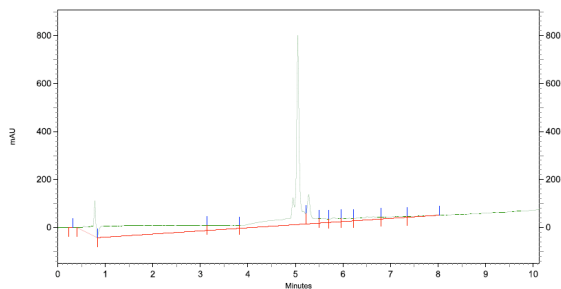

**Figure S9.** HPLC chromatogram of **9** (220 nm)

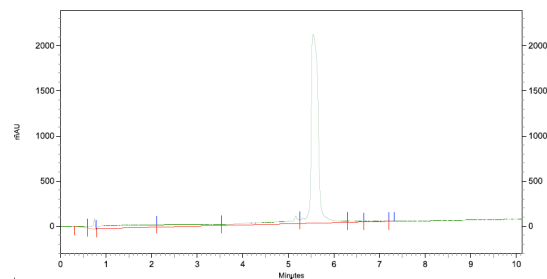

**Figure S10.** HPLC chromatogram of **10** (220 nm)

**Table S2.** Conditions for the binding assay between  $\text{Cu}^{2+}$  and PCV

|                                                       | Solution in cuvette | Titrant |
|-------------------------------------------------------|---------------------|---------|
| [HEPES], mM<br>(in 1:1 ethanol:H <sub>2</sub> O, v/v) | 50                  | 50      |
| [PCV], mM                                             | 0.075               | 0.075   |
| [Cu <sup>2+</sup> ], mM                               | 0                   | 0.750   |
| pH                                                    | 7.4                 | 7.4     |
| Total volume (μL)                                     | 2000                | 2000    |

**Table S3.** Conditions for the binding assays for peptides and  $\text{Cu}^{2+}$ :PCV complex

|                                                       | Solution in cuvette | Titrant                |
|-------------------------------------------------------|---------------------|------------------------|
| [HEPES], mM<br>(in 1:1 ethanol:H <sub>2</sub> O, v/v) | 50                  | 50                     |
| [PCV], mM                                             | 0.075               | 0.075                  |
| [Cu <sup>2+</sup> ], mM                               | 0.075               | 0.075                  |
| [Peptide], mM                                         | 0                   | Varied from 0.2 to 0.4 |
| pH                                                    | 7.4                 | 7.4                    |
| Total volume (μL)                                     | 2000                | 2000                   |

**Table S4.** Concentrations of solutions for cuvette assays to determine the optimal concentrations of peptides, metals and indicators composing the sensing ensemble

| Sensing ensemble                 | [Metal <sup>2+</sup> ], mM, in cuvette | [Indicator], mM, in cuvette | Composition of sensing ensemble chosen (peptide:metal:indicator) |
|----------------------------------|----------------------------------------|-----------------------------|------------------------------------------------------------------|
| PCV-Cu <sup>2+</sup> - <b>3</b>  | 0.075                                  | 0.075                       | 1:1:1                                                            |
| PCV-Cu <sup>2+</sup> - <b>4</b>  | 0.075                                  | 0.075                       | 0.5:1:1                                                          |
| PCV-Cu <sup>2+</sup> - <b>2</b>  | 0.075                                  | 0.075                       | 0.5:1:1                                                          |
| PCV-Cu <sup>2+</sup> - <b>1</b>  | 0.075                                  | 0.075                       | 1:1:1                                                            |
| PCV-Cu <sup>2+</sup> - <b>5</b>  | 0.075                                  | 0.075                       | 0.5:1:1                                                          |
| PCV-Cu <sup>2+</sup> - <b>6</b>  | 0.075                                  | 0.075                       | 0.25:1:1                                                         |
| PCV-Cu <sup>2+</sup> - <b>7</b>  | 0.075                                  | 0.075                       | 0.5:1:1                                                          |
| PCV-Cu <sup>2+</sup> - <b>8</b>  | 0.075                                  | 0.075                       | 0.5:1:1                                                          |
| PCV-Cu <sup>2+</sup> - <b>9</b>  | 0.075                                  | 0.075                       | 0.5:1:1                                                          |
| PCV-Cu <sup>2+</sup> - <b>10</b> | 0.075                                  | 0.075                       | 0.125:1:1                                                        |
| CAS-Cu <sup>2+</sup> - <b>3</b>  | 0.060                                  | 0.060                       | 0.5:1:1                                                          |
| CAS-Cu <sup>2+</sup> - <b>8</b>  | 0.060                                  | 0.060                       | 0.4:1:1                                                          |
| BPR-Ni <sup>2+</sup> - <b>3</b>  | 0.018                                  | 0.018                       | 0.75:1:1                                                         |
| BPR-Ni <sup>2+</sup> - <b>8</b>  | 0.018                                  | 0.018                       | 1:1:1                                                            |

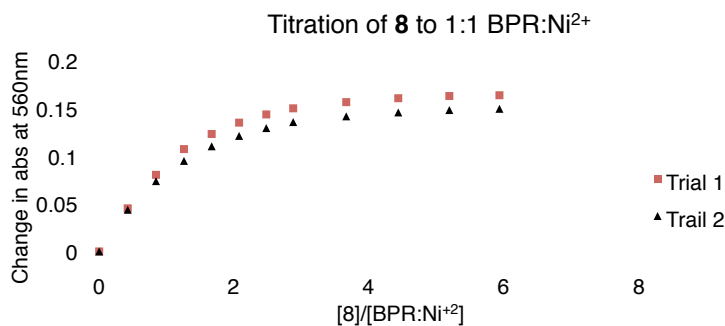

**Figure S11.** Binding curve from the titration of **8** to 1:1 NB (Ni<sup>2+</sup>-bromopyrogallol red complex)

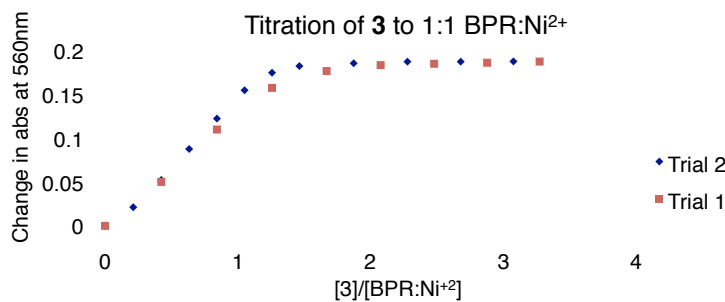

**Figure S12.** Binding curve from the titration of **3** to 1:1 NB (Ni<sup>2+</sup>-bromopyrogallol red complex)

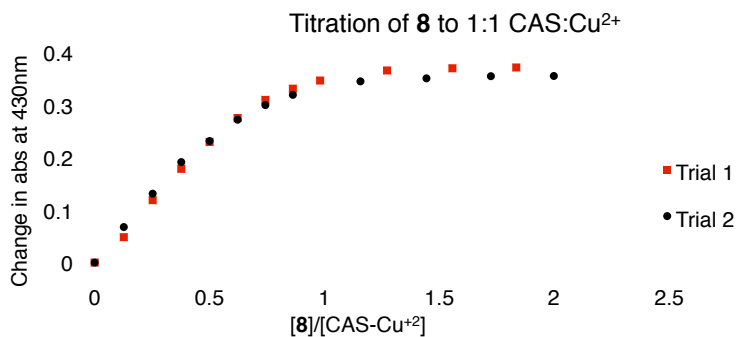

**Figure S13.** Binding curve from the titration of peptide **8** to CC (Cu<sup>2+</sup>-chromazurol S complex)

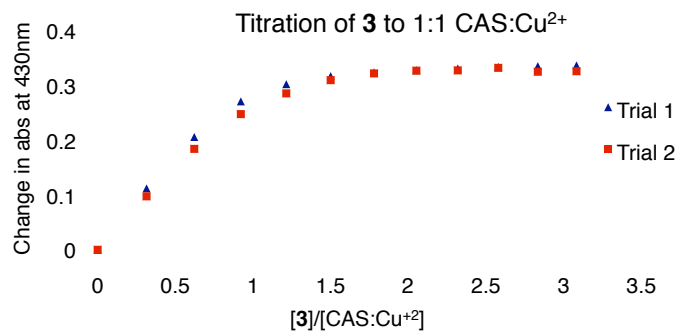

**Figure S14.** Binding curve from the titration of peptide **3** to CC (Cu<sup>2+</sup>-chromazurol S complex)

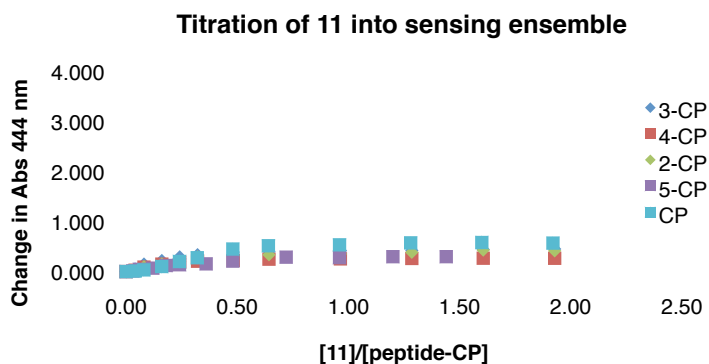

**Figure S15.** Titration of peptide **11** into peptide-CP complexes

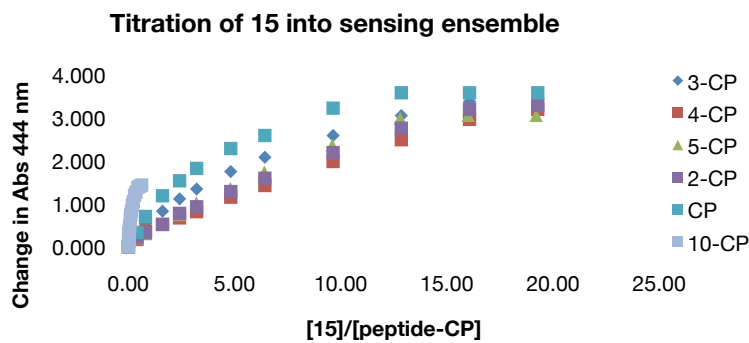

**Figure S16.** Titration of peptide **15** into peptide-CP complexes

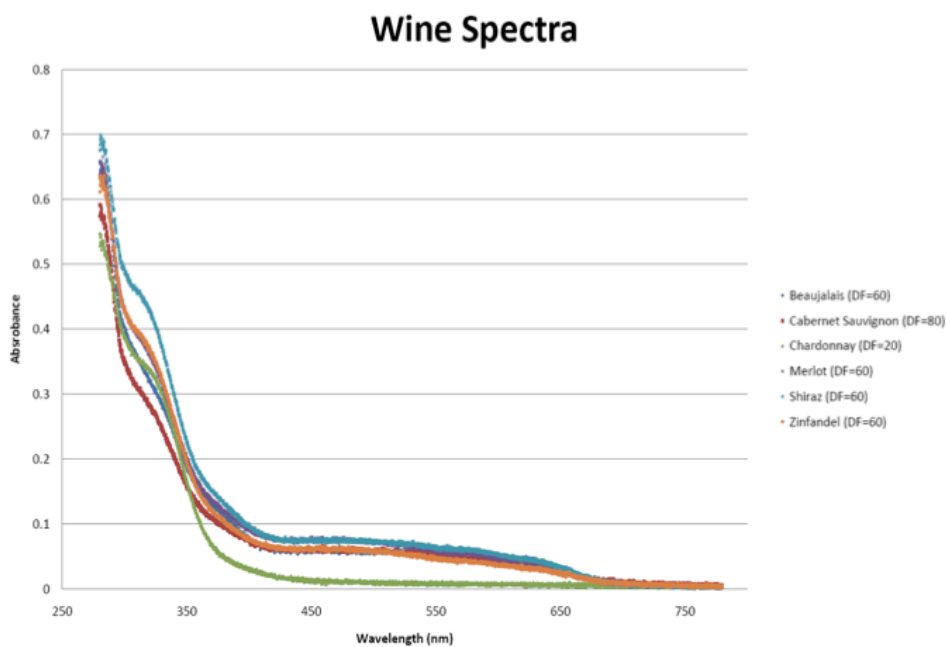

**Figure S17.** Spectra of different wines at pH 7.4. Wines were in 50 mM HEPES dissolved in 1:1 ethanol:water.

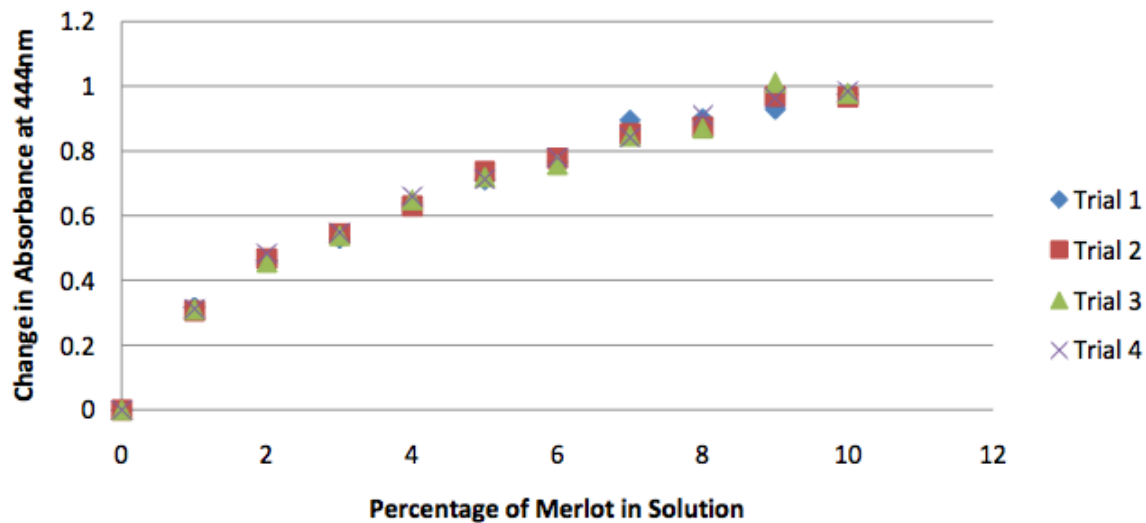

**Figure S18.** Binding curve of Merlot with PCV-Cu<sup>2+</sup>.

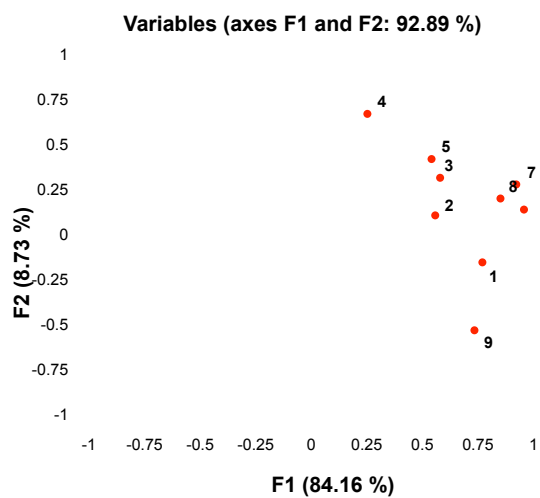

**Figure S19.** Variable correlation plot from the LDA of spectroscopic data from the discrimination of wine varietals using array Y. Sensing ensembles are represented by the peptide number.

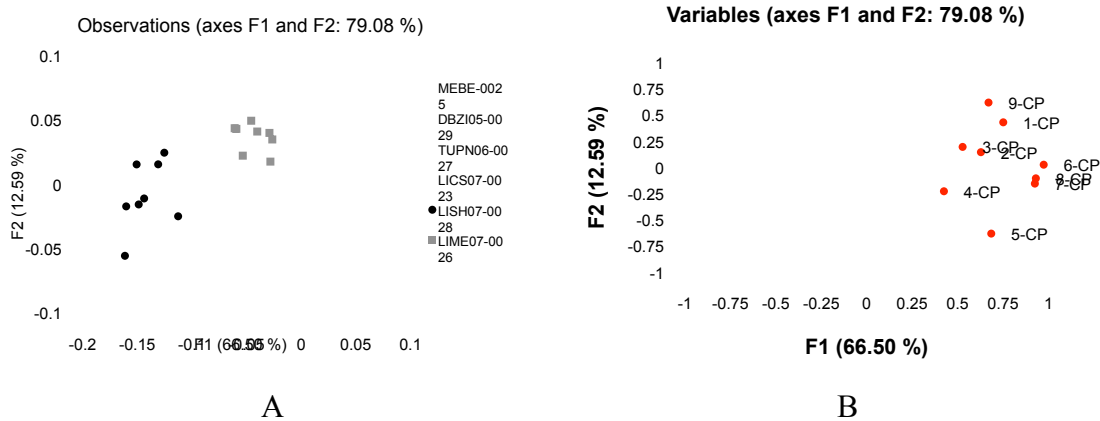

**Figure S20.** PCA score plot (A) and loading plot (B) from the evaluation of different wine varieties using array **Y**. Numbers represent the peptides in the peptide: $\text{Cu}^{2+}$ :pyrocatechol violet complex

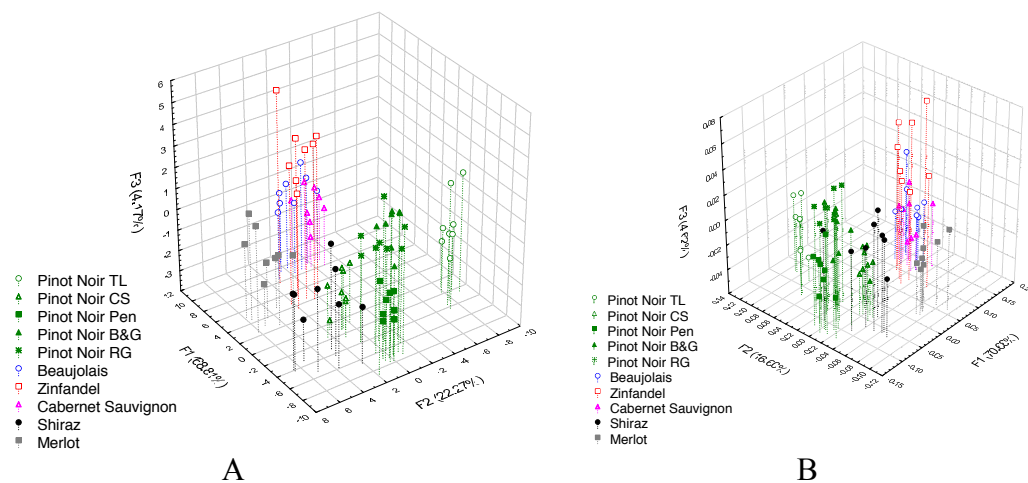

**Figure S21.** LDA (A) and PCA (B) plots from the evaluation of Pinot Noir wines and other wine varieties using array **Y**.



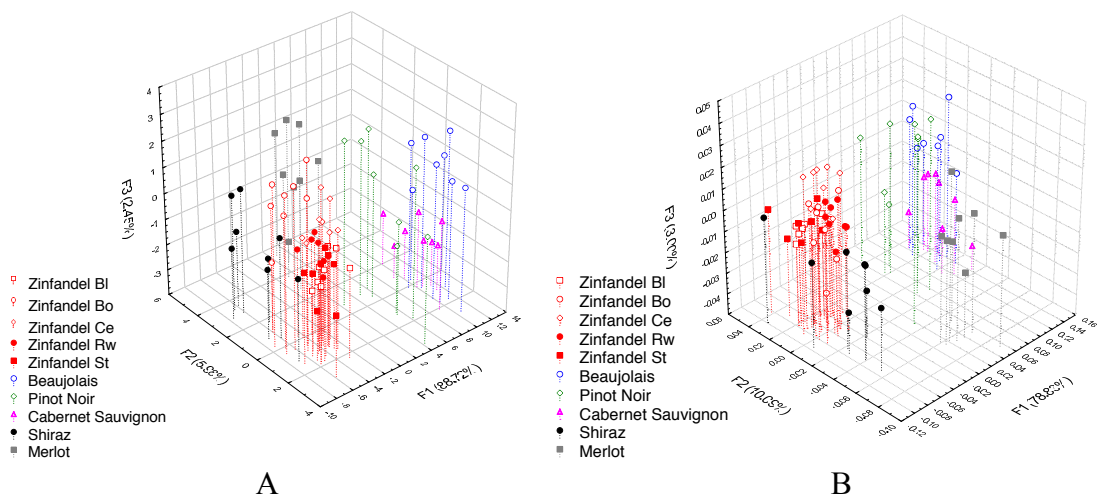

**Figure S22.** LDA (A) and PCA (B) plots from evaluation of Zinfandel wines and other varieties evaluated with array Y.

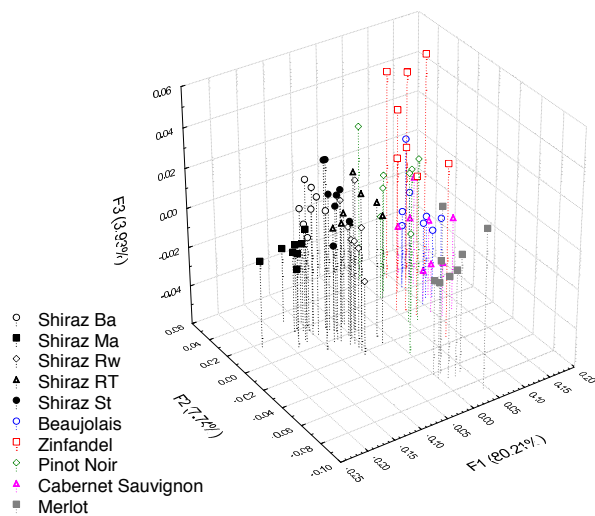

**Figure S23.** PCA from the evaluation of Shiraz wines and other varieties using array Y

A

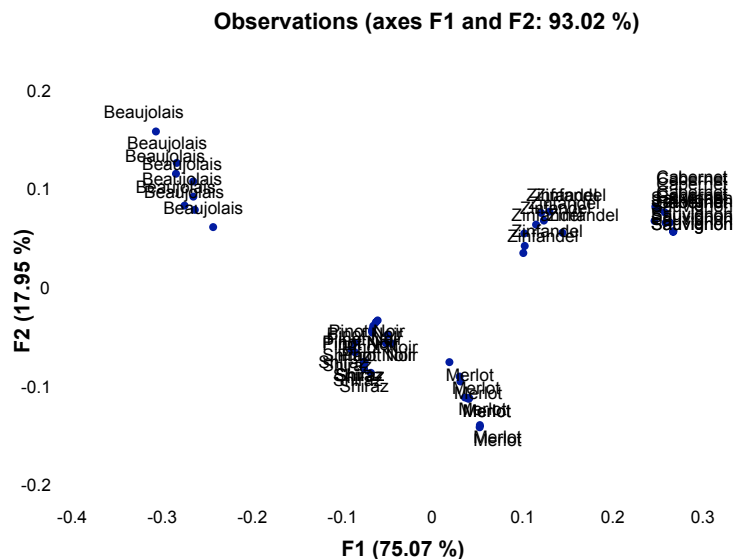

B

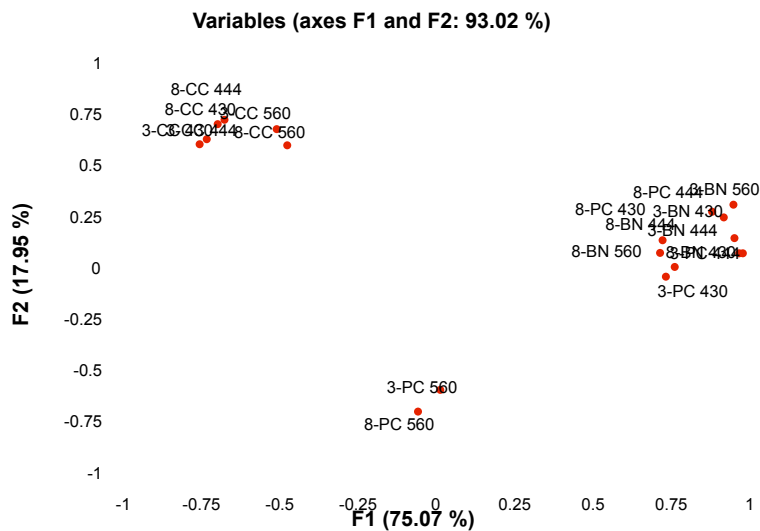

**Figure S24.** (A) Score plot and (B) corresponding loading plot of PCA of UV-vis response from the evaluation of different wine varieties using array **Z**.

A

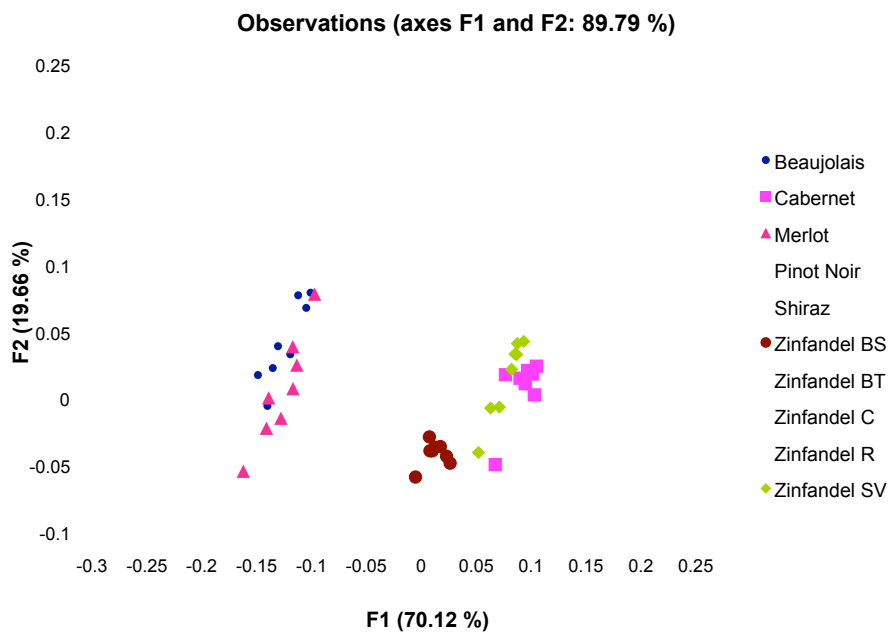

B

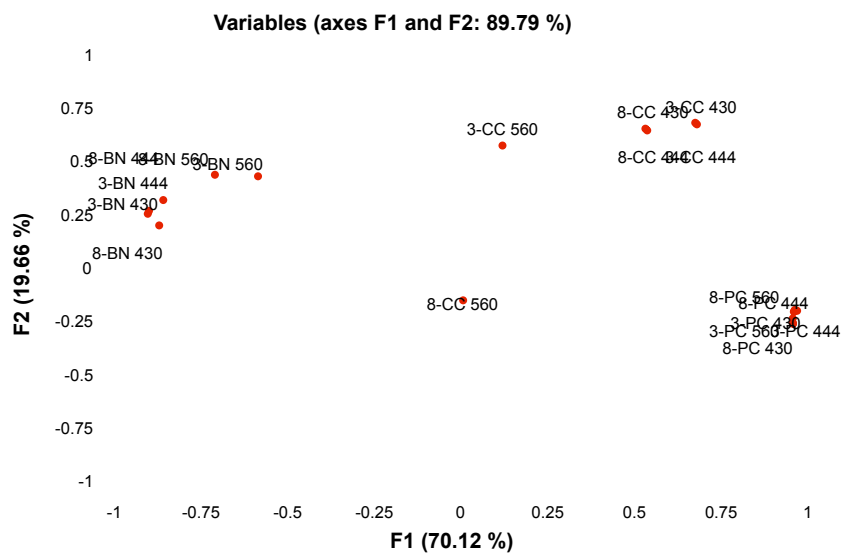

**Figure S25.** (A) Score plot and (B) corresponding loading plot of PCA of UV-vis response from the evaluation of different wine varieties and different brands of Zinfandel wines BS, BT, C, R, and SV with array **Z**.

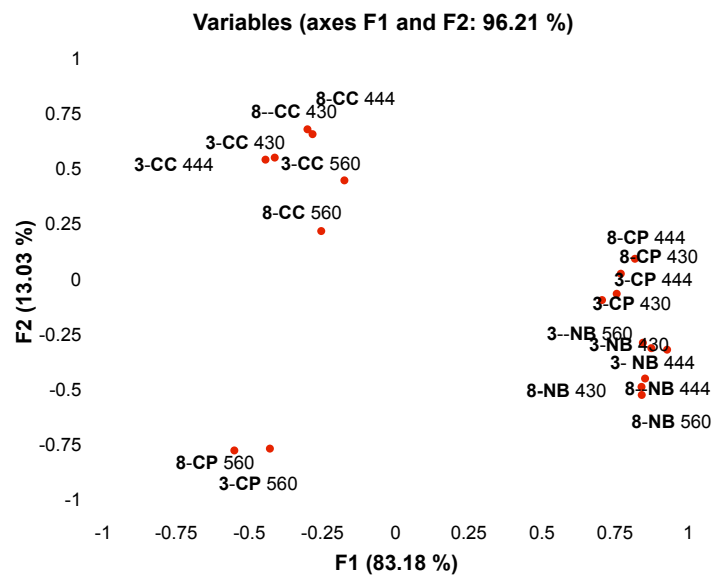

**Figure S26.** Variable correlation plot from the LDA of spectroscopic data from the discrimination of Zinfandel wines and other wine varietals using array **Z**.
